# Supplementary material
Source: publisher site journal article supplement (https://www.dovepress.com/article/358782)
Supplement: Supplementary file 1 [file get_supplementary_file.php]

**Supplementary Figure 1**. Design of the study

**
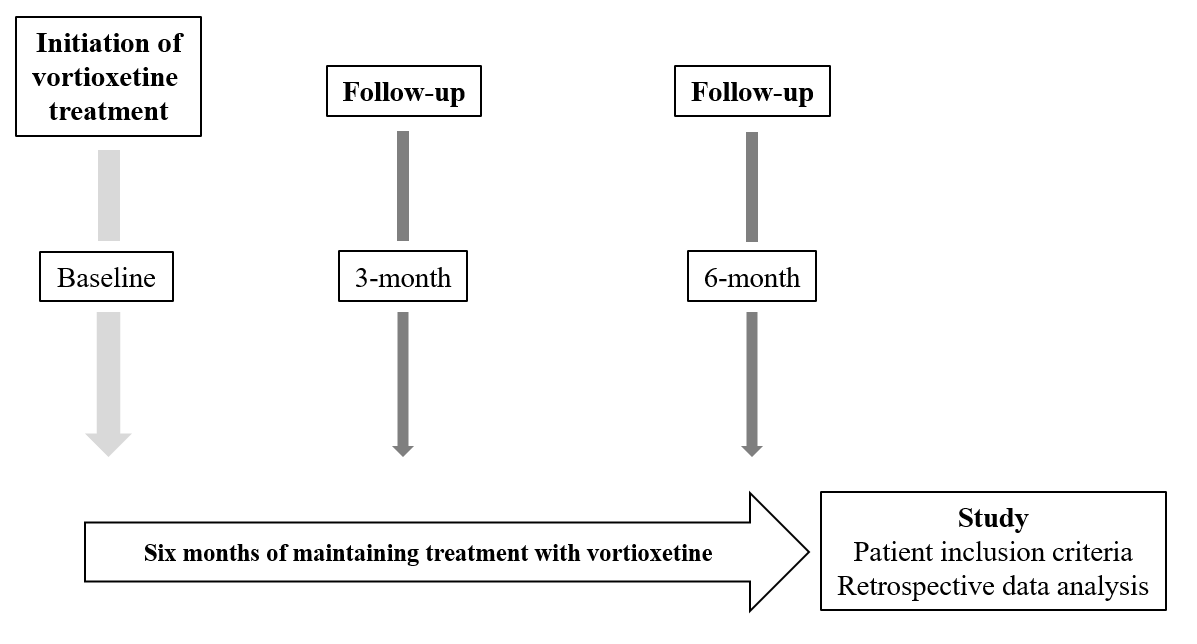
**

**Supplementary Table 1**. Effect of vortioxetine treatment by number of substances use disorders

|  | **MDD + one SUD**  **N=35** | | | | | **MDD + several SUDs**  **N=45** | | | | | **p**** |
| --- | --- | --- | --- | --- | --- | --- | --- | --- | --- | --- | --- |
|  | **Baseline** | **3-month** | | **6-month** | | **Baseline** | **3-month** | | **6-month** | |
| **MADRS** |  |  | **p *** |  | **p *** |  |  | **p *** |  | **p *** |
| Total score | 26.1  (21.2-31.1) | 17.7  (14.6-20.9) | <0.001 | 11.6  (9.2-14.0) | <0.001 | 31.1  (27.8-34.3) | 17.7  (15.1-20.3) | <0.001 | 12.4  (9.6-15.2) | <0.001 | 0.202  0.574 |
| **SDI scale** |  |  |  |  |  |  |  |  |  |  |  |
| Global functional impairment | 24.8  (21.5-28.2) | 19.1  (15.7-22.4) | <0.001 | 16.3  (13.0-19.5) | <0.001 | 27.5  (24.7-30.3) | 19.1  (16.4-21.8) | <0.001 | 17.0  (14.3-19.7) | <0.001 | 0.194  0.600 |
| **SDMT** |  |  |  |  |  |  |  |  |  |  |  |
| Number of correct answers | 34.1  (29.6, 38.6) | 38.3  (33.6, 43.1) | 0.010 | 42.8  (36.0, 49.5) | 0.001 | 35.3  (31.1, 39.4) | 39.4  (35.2, 43.6) | <0.001 | 43.1  (39.0, 47.1) | <0.001 | 0.737  0.873 |
| **CGI test** |  |  |  |  |  |  |  |  |  |  |  |
| Disease severity | 2.6  (2.0-3.3) | 1.9  (1.5-2.2) | 0.034 | 0.9  (0.5-1.4) | 0.001 | 3.3  (2.6-3.9) | 1.8  (1.5-2.2) | <0.001 | 0.9  (0.6-1.2) | <0.001 | 0.536  0.259 |
| Global improvement | 3.5  (3.1-3.8) | 2.8  (2.5-3.1) | <0.001 | 2.3  (1.8-2.7) | <0.001 | 4.0  (3.8-4.3) | 3.2  (2.9-3.4) | <0.001 | 2.6  (2.2-2.9) | <0.001 | 0.869  0.561 |

MDD, mayor depression disease; SUD, substances use disorder, MADRS, Montgomery-Åsberg depression rating scale; SDI, Sheehan disability inventory; SDMT, symbol digit modalities test; CGI, Clinical global impression

If not indicated otherwise, all values are mean scores (95% confidence interval)

* Difference with baseline

** Difference between groups at 3-month and 6-month.

**Supplementary Table 2**. Effect of vortioxetine treatment by dose of vortioxetine

| **Dose of vortioxetine** | | **5-10 mg**  **N=37** | **15 mg**  **N=8** | **20 mg**  **N=35** | **p**** |
| --- | --- | --- | --- | --- | --- |
| **MADRS** | |  |  |  |  |
| Total score | |  |  |  |  |
| Baseline | Mean (95%CI) | 27.6 (23.0-32.2) | 31.0 (20.1-41.9) | 29.8 (25.9-33.8) |  |
| 3-month | Mean (95%CI) | 17.0 (13.9-20.1) | 20.8 (10.6-30.9) | 17.8 (15.1-20.4) |  |
|  | p* | <0.001 | <0.001 | <0.001 | 0.672 |
| 6-month | Mean (95%CI) | 11.6 (8.9-14.3) | 12.9 (5.6-20.2) | 12.3 (9.3-15.4) |  |
|  | p* | <0.001 | <0.001 | <0.001 | 0.999 |
| **SDI scale** | |  |  |  |  |
| Global functional impairment | |  |  |  |  |
| Baseline | Mean (95%CI) | 25.5 (21.9-29.0) | 30.9 (21.6-40.1) | 26.2 (23.5-28.9) |  |
| 3-month | Mean (95%CI) | 18.8 (15.4-22.2) | 24.9 (14.6-35.2) | 18.1 (15.7-20.5) |  |
|  | p* | <0.001 | 0.011 | <0.001 | 0.339 |
| 6-month | Mean (95%CI) | 16.8 (13.4-20.2) | 20.5 (11.0-30.0) | 15.6 (13.1-18.1) |  |
|  | p* | <0.001 | 0.002 | <0.001 | 0.418 |
| **SDMT** | |  |  |  |  |
| Number of correct answers | |  |  |  |  |
| Baseline | Mean (95%CI) | 33.1 (29.3-36.9) | 31.5 (13.9-49.1) | 37.0 (32.2-41.8) |  |
| 3-month | Mean (95%CI) | 38.4 (33.5-43.3) | 38.4 (18.5-58.3) | 39.6 (35.5-43.8) |  |
|  | p* | <0.001 | 0.011 | 0.031 | 0.148 |
| 6-month | Mean (95%CI) | 43.8 (37.9-49.7) | 38.0 (9.2-66.8) | 42.9 (38.5-47.3) |  |
|  | p* | <0.001 | 0.107 | <0.001 | 0.647 |
| **CGI test** | |  |  |  |  |
| Disease severity | |  |  |  |  |
| Baseline | Mean (95%CI) | 2.71 (1.8) | 2.83 (1.2) | 3.30 (2.0) |  |
| 3-month | Mean (95%CI) | 1.59 (1.0) | 2.00 (0.9) | 2.06 (1.1) |  |
|  | p* | 0.004 | 0.102 | 0.003 | 0.419 |
| 6-month | Mean (95%CI) | 0.86 (1.1) | 0.75 (0.7) | 1.06 (1.2) |  |
|  | p* | 0.001 | 0.018 | 0.001 | 0.986 |
|  | |  |  |  |  |
| Global improvement | |  |  |  |  |
| Baseline | Mean (95%CI) | 3.62 (3.3-4.0) | 4.13 (3.4-4.8) | 3.89 (3.6-4.2) |  |
| 3-month | Mean (95%CI) | 2.89 (2.6-3.2) | 3.25 (2.5-4.0) | 3.11 (2.8-3.4) |  |
|  | p* | <0.001 | 0.016 | <0.001 | 0.928 |
| 6-month | Mean (95%CI) | 2.41 (2.0-2.8) | 3.38 (2.2-4.6) | 2.23 (1.8-2.6) |  |
|  | p* | <0.001 | 0.020 | <0.001 | 0.039¥ |

MDD, mayor depression disease; SUD, substance use disorder, MADRS, Montgomery-Åsberg depression rating scale; SDI, Sheehan disability inventory; SDMT, symbol digit modalities test; CGI, Clinical global impression; 95%CI, 95% confidence interval.

If not indicated otherwise, all values are mean scores (95% confidence interval)

* Difference with baseline

** Difference between groups

¥ Difference between dose of 15 mg and dose of 20 mg: change of -0.75 vs -1.66, p=0.049

**Supplementary Table 3**. Effect of vortioxetine treatment

|  | **Baseline** | **3-month** | | **6-month** | |
| --- | --- | --- | --- | --- | --- |
| **MADRS** |  |  | **p *** |  | **p *** |
| N available | 80 | 80 |  | 80 |  |
| Total score | 28.9 (26.1 - 31.7) | 17.7 (15.7 - 19.7) | <0.001 | 12.0 (10.2 - 13.9) | <0.001 |
| Apparent sadness | 3.2 (2.9 - 3.6) | 1.9 (1.6 - 2.2) | <0.001 | 1.4 (1.1 - 1.6) | <0.001 |
| Reported sadness | 3.4 (3.0 - 3.7) | 2.0 (1.7 - 2.3) | <0.001 | 1.3 (1.1 - 1.5) | <0.001 |
| Inner tension | 3.2 (2.8 - 3.5) | 2.0 (1.7 - 2.2) | <0.001 | 1.5 (1.2 - 1.7) | <0.001 |
| Reduced sleep | 2.6 (2.2 - 3.0) | 1.7 (1.5 - 2.0) | <0.001 | 1.2 (0.9 - 1.4) | <0.001 |
| Reduced appetite | 2.1 (1.7 - 2.5) | 1.3 (1.0 - 1.6) | <0.001 | 0.8 (0.6 - 1.1) | <0.001 |
| Concentration difficulties | 3.2 (2.8 - 3.5) | 2.0 (1.8 - 2.3) | <0.001 | 1.4 (1.2 - 1.7) | <0.001 |
| Lassitude | 3.1 (2.7 - 3.5) | 1.8 (1.5 - 2.0) | <0.001 | 1.2 (0.9 - 1.5) | <0.001 |
| Inability to feel | 3.1 (2.7 - 3.5) | 2.0 (1.7 - 2.2) | <0.001 | 1.2 (1.0 - 1.4) | <0.001 |
| Pessimistic thoughts | 2.9 (2.5 - 3.3) | 1.8 (1.5 - 2.1) | <0.001 | 1.3 (1.0 - 1.6) | <0.001 |
| Suicidal thoughts | 2.2 (1.8 - 2.5) | 1.3 (1.1 - 1.5) | <0.001 | 0.8 (0.6 - 1.0) | <0.001 |
| **SDI scale** |  |  |  |  |  |
| N available | 80 | 80 |  | 80 |  |
| Global functional impairment | 26.3 (24.2 - 28.5) | 19.1 (17.0 - 21.1) | <0.001 | 16.7 (14.6 - 18.7) | <0.001 |
| Total functional impairment | 15.8 (14.1 - 17.5) | 10.3 (8.7 - 11.9) | <0.001 | 7.8 (6.1 - 9.4) | <0.001 |
| Work/School | 5.3 (4.7 - 6.0) | 3.7 (3.1 - 4.4) | <0.001 | 2.8 (2.1 - 3.4) | <0.001 |
| Social life | 5.6 (5.0 - 6.2) | 3.3 (2.7 - 3.8) | <0.001 | 2.6 (2.0 - 3.1) | <0.001 |
| Family life | 4.9 (4.3 - 5.5) | 3.3 (2.7 - 3.9) | <0.001 | 2.4 (1.9 - 2.9) | <0.001 |
| Perceived stress | 5.0 (4.4 - 5.6) | 2.9 (2.4 - 3.4) | <0.001 | 2.4 (1.9 - 2.8) | <0.001 |
| Perceived social support | 54.9 (48.9 - 60.9) | 59.1 (53.7 - 64.6) | 0.022 | 65.3 (60.1 - 70.4) | <0.001 |
| **SDMT** |  |  |  |  |  |
| N available | 49 | 50 |  | 53 |  |
| Number of questions | 41.6 (39.2 - 44.0) | 44.7 (42.4 - 47.1) | 0.002 | 49.2 (46.3 - 52.1) | <0.001 |
| Number of correct answers | 40.4 (37.8 - 42.9) | 43.8 (41.5 - 46.1) | <0.001 | 48.4 (45.6 - 51.2) | <0.001 |
| Percentage of correct answers | 96.8 (95.0 - 98.6) | 98.0 (97.1 - 98.8) | 0.219 | 98.5 (97.9 - 99.0) | 0.143 |
| Wrong answers | 1.3 (0.6 - 1.9) | 0.9 (0.5 - 1.3) | 0.425 | 0.8 (0.5 - 1.1) | 0.535 |
| **CGI test** |  |  |  |  |  |
| N available | 80 | 80 |  | 80 |  |
| Disease severity | 3.8 (3.6 - 4.0) | 3.0 (2.8 - 3.2) | <0.001 | 2.4 (2.1 - 2.7) | <0.001 |
| Normal/not ill, n (%) | 0 (0.0) | 0 (0.0) |  | 3 (3.8) |  |
| Borderline mentally ill/not at all ill, n (%) | 0 (0.0) | 2 (2.5) |  | 14 (17.5) |  |
| Mildly ill, n (%) | 10 (12.5) | 21 (26.3) |  | 33 (41.3) |  |
| Moderately ill, n (%) | 20 (25.0) | 33 (41.3) |  | 12 (15.0) |  |
| Markedly ill, n (%) | 27 (33.8) | 21 (26.3) |  | 12 (15.0) |  |
| Severely ill, n (%) | 23 (28.8) | 3 (3.8) |  | 6 (7.5) |  |
| Global improvement | 3.0 (2.5 - 3.4) | 1.8 (1.6 - 2.1) | <0.001 | 0.9 (0.7 - 1.2) | <0.001 |
| Not evaluated, n (%) | 16 (20.0) | 0 (0.0) |  | 0 (0.0) |  |
| Very much improved, n (%) | 6 (7.5) | 7 (8.8) |  | 35 (43.8) |  |
| Much improved, n (%) | 8 (10.0) | 22 (27.5) |  | 28 (35.0) |  |
| Minimally improved, n (%) | 17 (21.3) | 34 (42.5) |  | 9 (11.3) |  |
| Not change, n (%) | 10 (12.5) | 12 (15.0) |  | 4 (5.0) |  |
| Minimally worse, n (%) | 2 (2.5) | 4 (5.0) |  | 3 (3.8) |  |
| Much worse, n (%) | 16 (20.0) | 1 (1.3) |  | 1 (1.3) |  |
| Very much worse, n (%) | 5 (6.3) | 0 (0.0) |  | 0 (0.0) |  |

MADRS, Montgomery-Åsberg depression rating scale; SDI, Sheehan disability inventory; SDMT, symbol digit modalities test; CGI, Clinical global impression

If not indicated otherwise, all values are mean scores (95% confidence interval)

* Difference with baseline
